# Supplementary material
Source: MDPI journal article supplement (https://www.mdpi.com/2227-9717/11/9/2764)
Supplement: s1 [file s1]

Table S1. 20 kinetic mechanism function models of solid pyrolysis [11].

| Reaction mechanism                            | Number | Symbol           | $g(\alpha)$                            | $f(\alpha)$                                            |
|-----------------------------------------------|--------|------------------|----------------------------------------|--------------------------------------------------------|
| Power law                                     | 1      | P <sub>1</sub>   | $\alpha^{1/2}$                         | $2\alpha^{1/2}$                                        |
|                                               | 2      | P <sub>2</sub>   | $\alpha^{1/3}$                         | $3\alpha^{2/3}$                                        |
|                                               | 3      | P <sub>3</sub>   | $\alpha^{1/4}$                         | $4\alpha^{3/4}$                                        |
| Random nucleation and growth of nuclei models | 4      | A <sub>1/2</sub> | $[-\ln(1-\alpha)]^2$                   | $\frac{1}{2}(1-\alpha)[- \ln(1-\alpha)]^{-1}$          |
|                                               | 5      | A <sub>1</sub>   | $-\ln(1-\alpha)$                       | $(1-\alpha)[- \ln(1-\alpha)]$                          |
|                                               | 6      | A <sub>4/3</sub> | $[-\ln(1-\alpha)]^{3/4}$               | $\frac{4}{3}(1-\alpha)[- \ln(1-\alpha)]^{1/4}$         |
|                                               | 7      | A <sub>3/2</sub> | $[-\ln(1-\alpha)]^{2/3}$               | $\frac{3}{2}(1-\alpha)[- \ln(1-\alpha)]^{1/3}$         |
|                                               | 8      | A <sub>2</sub>   | $[-\ln(1-\alpha)]^{1/2}$               | $2(1-\alpha)[- \ln(1-\alpha)]^{1/2}$                   |
|                                               | 9      | A <sub>5/2</sub> | $[-\ln(1-\alpha)]^{2/5}$               | $\frac{5}{2}(1-\alpha)[- \ln(1-\alpha)]^{3/5}$         |
|                                               | 10     | A <sub>3</sub>   | $[-\ln(1-\alpha)]^{1/3}$               | $3(1-\alpha)[- \ln(1-\alpha)]^{2/3}$                   |
|                                               | 11     | A <sub>4</sub>   | $[-\ln(1-\alpha)]^{1/4}$               | $4(1-\alpha)[- \ln(1-\alpha)]^{3/4}$                   |
| Reaction order                                | 12     | F <sub>3/2</sub> | $2(1-\alpha)^{-3/2}$                   | $(1-\alpha)^{-1/2}$                                    |
|                                               | 13     | F <sub>2</sub>   | $(1-\alpha)^{-1}$                      | $(1-\alpha)^2$                                         |
|                                               | 14     | F <sub>3</sub>   | $(1-\alpha)^{-2}$                      | $(1-\alpha)^3$                                         |
| Phase boundary controlled reaction            | 15     | R <sub>2</sub>   | $1-(1-\alpha)^{1/2}$                   | $2(1-\alpha)^{2/3}$                                    |
|                                               | 16     | R <sub>3</sub>   | $1-(1-\alpha)^{1/3}$                   | $3(1-\alpha)^{1/2}$                                    |
| Diffusion model                               | 17     | D <sub>1</sub>   | $\alpha^2$                             | $\frac{1}{2}\alpha^{-1}$                               |
|                                               | 18     | D <sub>2</sub>   | $\alpha+(1-\alpha)\ln(1-\alpha)$       | $[-\ln(1-\alpha)]^{-1}$                                |
|                                               | 19     | D <sub>3</sub>   | $[1-(1-\alpha)^{1/3}]^2$               | $\frac{3}{2}(1-\alpha)^{2/3}[1-(1-\alpha)^{1/3}]^{-1}$ |
|                                               | 20     | D <sub>4</sub>   | $1-\frac{2}{3}\alpha-(1-\alpha)^{2/3}$ | $\frac{3}{2}[(1-\alpha)^{2/3}-1]^{-1}$                 |

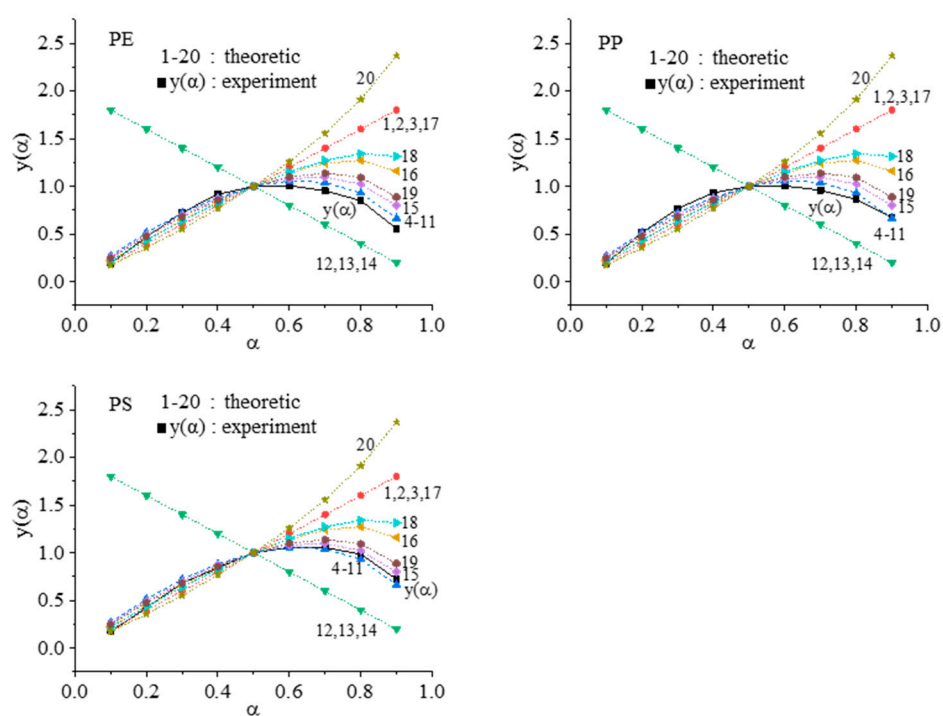

Figure S1 Fitting theoretical and experimental curves under Mark method of PE, PP and PS plastics.
